# Supplementary material
Source: Springer Nature journal article supplement (https://www.springermedizin.de/resource/supplementary/12883_2005_2_MOESM3_ESM.pdf/9456834)

*Population*

*Primary care*

*Secondary and tertiary care*

*Tests*

*Research Respondents*

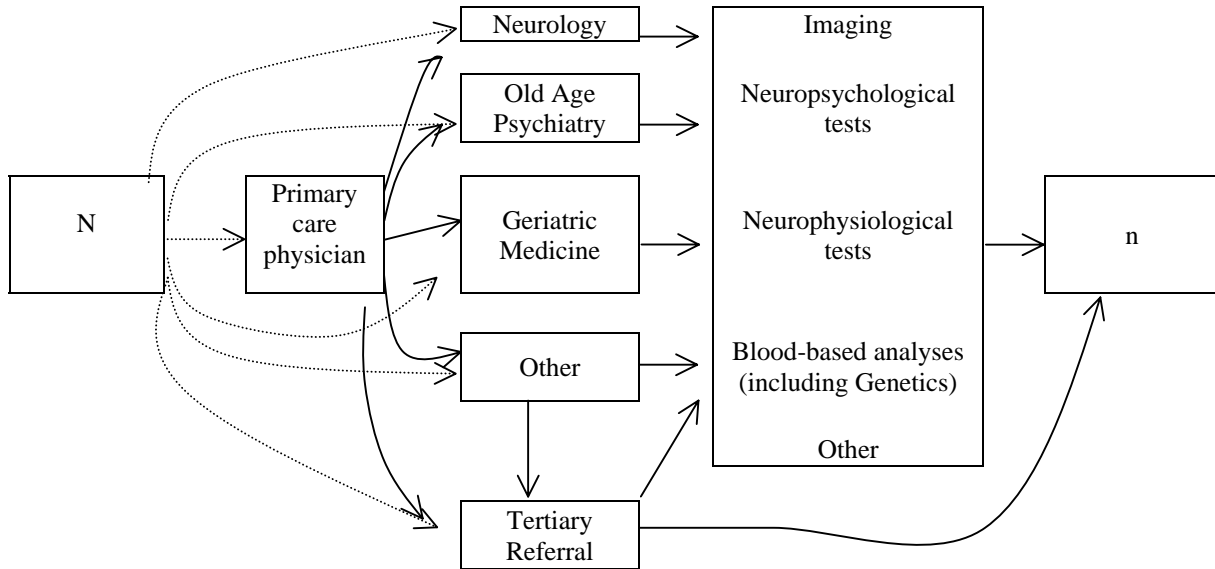

Supplement: MOESM3 [file 9456834]
